# Supplementary material for: Experimental–numerical method for calculating bending moments in swimming fish shows that fish larvae control undulatory swimming with simple actuation
Source: PubMed Central journal article supplement (PMC7481021; doi:10.1371/journal.pbio.3000462), 2020-07-22
Supplement: pbio.3000462.s007.pdf [file pbio.3000462.s007.pdf]

## **Response to reviewers**

### **Reviewer #2**

#### *Comment 2.1*

*I am grateful for the considerable work put in to responding to my previous comments.*

*The current draft looks very nice. Any wider adoption of the new methods may end being dependent on how easily they can be implemented using the code being made available.*

#### **Reply 2.1**

We thank the reviewer for his positive comment and previous comments that helped to improve this paper. The source code will be made available on Dryad with appropriate documentation.

### **Reviewer #3**

#### *Comment 3.1*

*The authors have sufficiently addressed my concerns and the manuscript is ready for publication.*

#### **Reply 3.1**

We thank the Dr Tytell for his final positive comment and for his previous comments that helped to improve this paper.
